# Supplementary material for: Synthesis of self-assembled mesoporous 3D In2O3 hierarchical micro flowers composed of nanosheets and their electrochemical properties
Source: Royal Society of Chemistry journal article supplement (doi:10.1039/c8ra03573c), 2018-01-01
Supplement: c8ra03573c1.pdf [file c8ra03573c1.pdf]

## Electronic Supplementary Information

# Synthesis of self-assembled mesoporous 3D In<sub>2</sub>O<sub>3</sub> hierarchical micro flowers composed of nanosheets and its electrochemical properties

**Balasubramaniam Arul Prakasam,<sup>a, b,\*</sup> Manu Lahtinen,<sup>c</sup> Anssi Peuronen,<sup>c</sup> Govindhasamy Manikandan,<sup>b</sup> Manickavachagam Muruganandham,<sup>d</sup> Mika Sillanpää<sup>a, e</sup>**

*<sup>a</sup>Laboratory of Green Chemistry, School of Engineering Science, Lappeenranta University of Technology, Sammonkatu 12, FI-50130 Mikkeli, Finland*

*<sup>b</sup>Department of Chemistry, Annamalai University, Annamalainagar, 608002, India*

*<sup>c</sup>Department of Chemistry, Laboratories of Inorganic and Analytical Chemistry, P.O.Box 35, FI-40014, University of Jyväskylä, Finland*

*<sup>d</sup>Department of Civil and Environmental Engineering, Temple University, Philadelphia, PA-19122, USA*

*<sup>e</sup>Department of Civil and Environmental Engineering, Florida International University, Miami, FL-33174, USA*

---

\* Corresponding author.

*E-mail address:* arul7777@yahoo.com (B. Arul Prakasam)

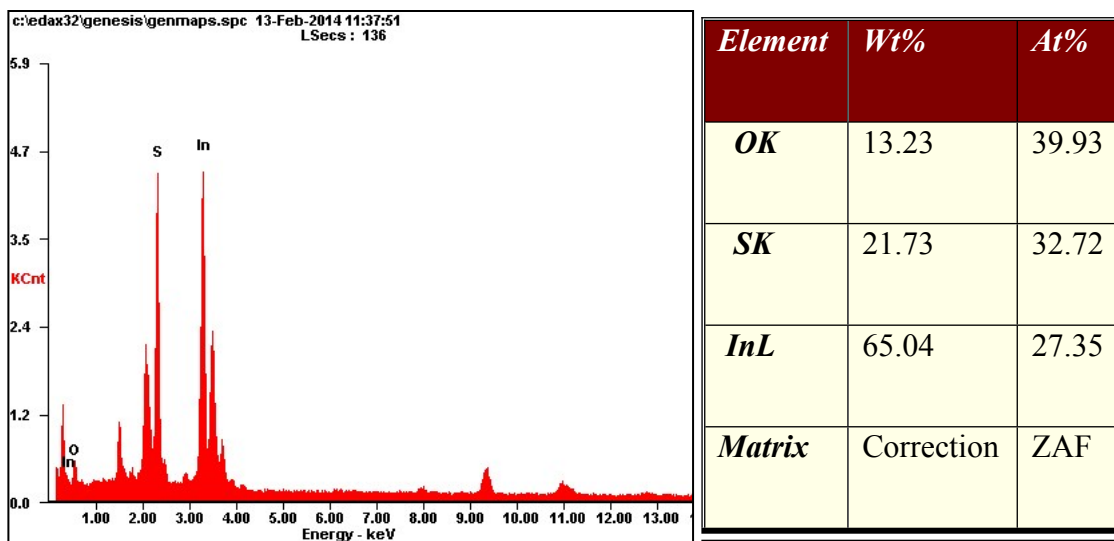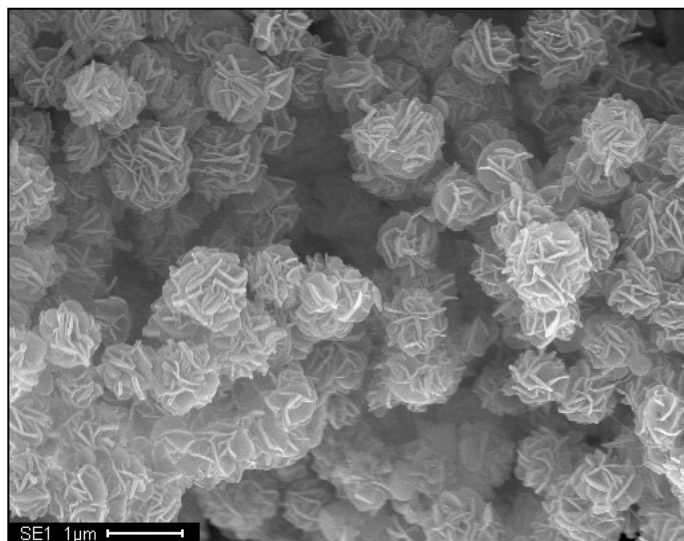

Fig. S1. EDX spectrum of hydrothermal product.

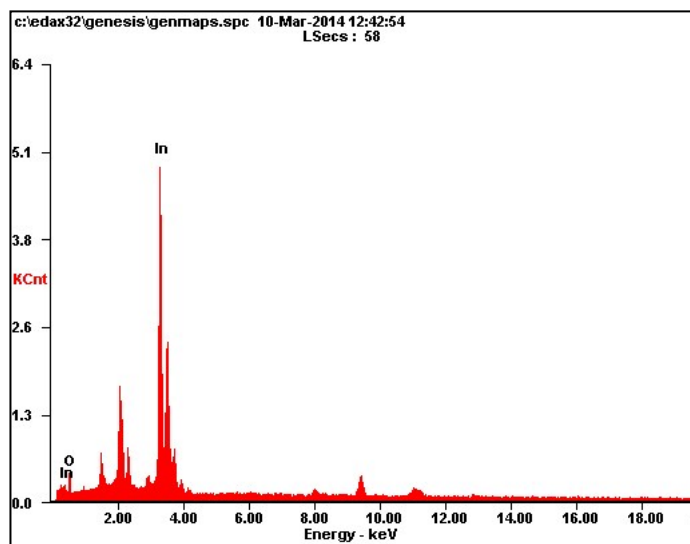

| <i>Element</i> | <i>Wt%</i> | <i>At%</i> |
|----------------|------------|------------|
| <i>OK</i>      | 22.07      | 67.03      |
| <i>InL</i>     | 77.93      | 32.97      |
| <i>Matrix</i>  | Correction | ZAF        |

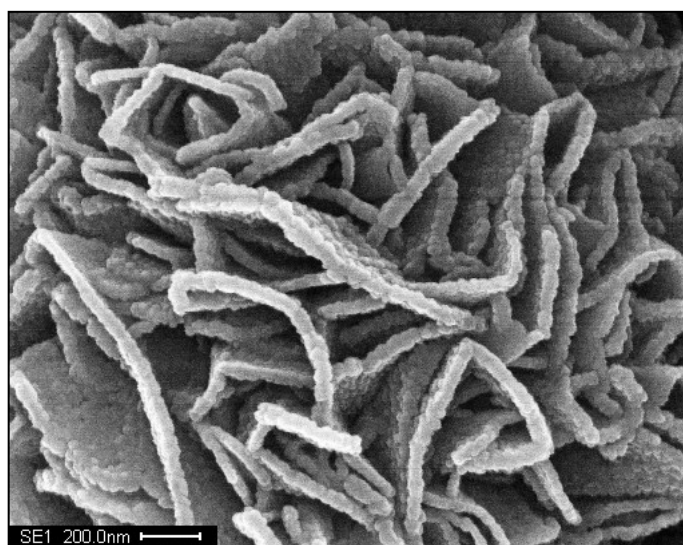

Fig. S2. EDX spectrum of calcinated product ( $\text{In}_2\text{O}_3$  micro flowers).

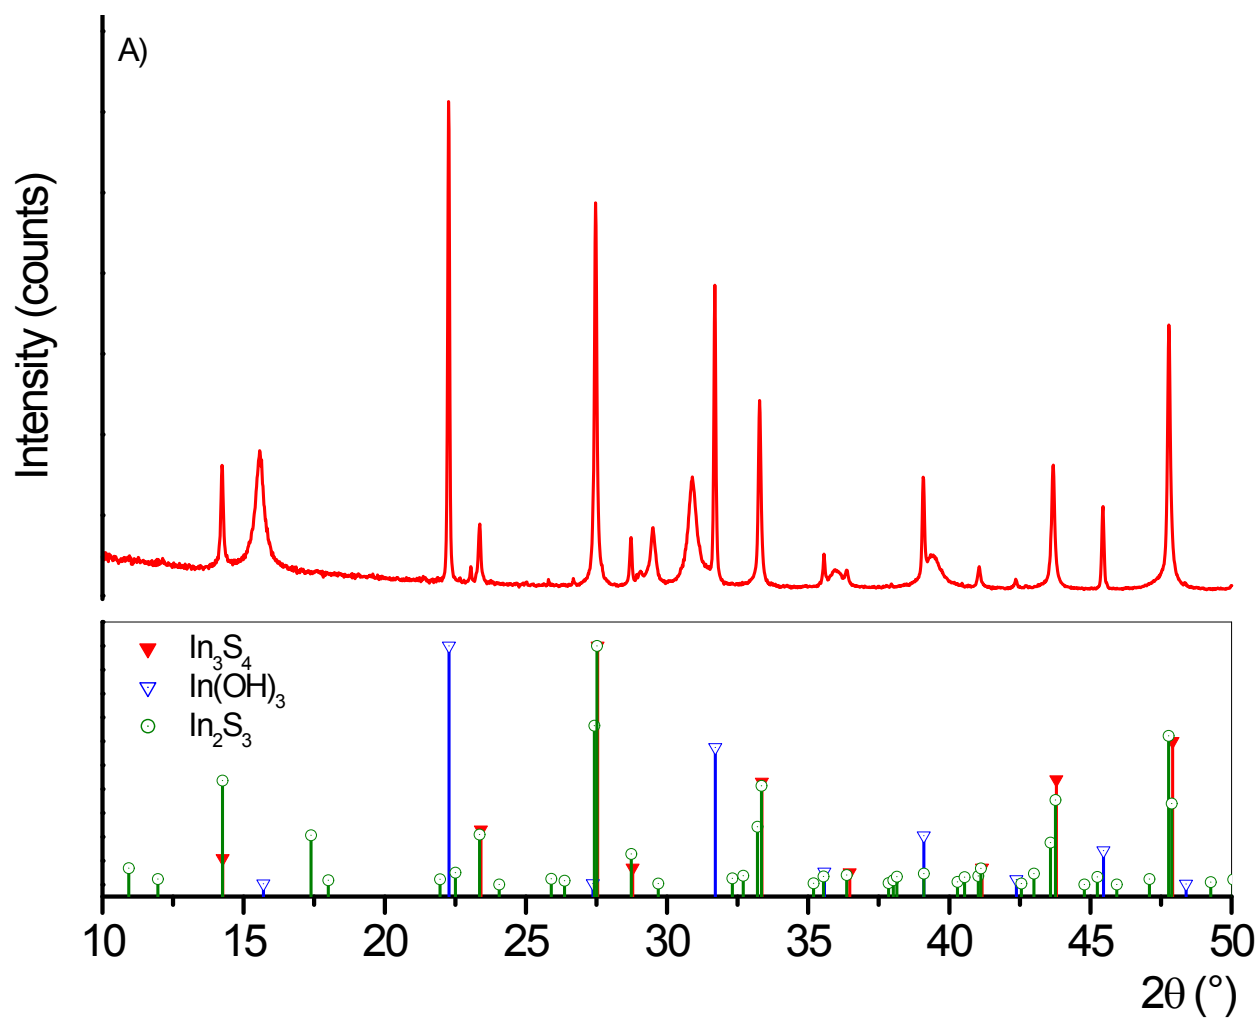

Fig. S3. Top: powder X-ray diffraction pattern of hydrothermal product, below: tick marks representing the characteristic Bragg peak positions of  $\text{In}_3\text{S}_4$ ,  $\text{In}(\text{OH})_3$  and  $\text{In}_2\text{S}_3$  (red, blue and green colors, respectively).

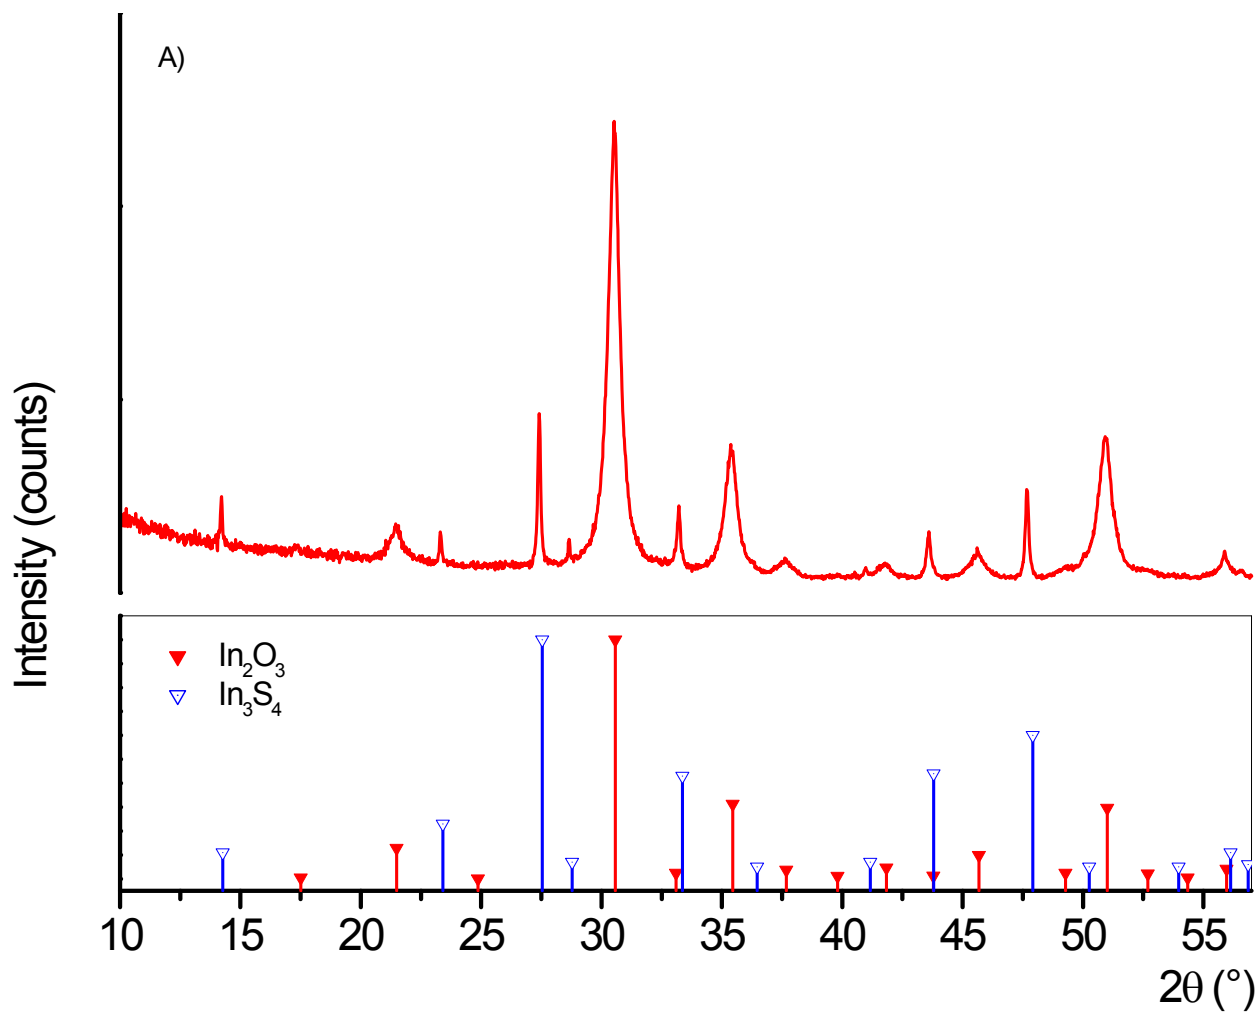

Fig. S4. Top: powder X-ray diffraction pattern of hydrothermal product calcinated at 400 °C for 2h, below: tick marks for characteristic Bragg peak positions of  $\text{In}_2\text{O}_3$  and  $\text{In}_3\text{S}_4$  (blue and red colors, respectively).

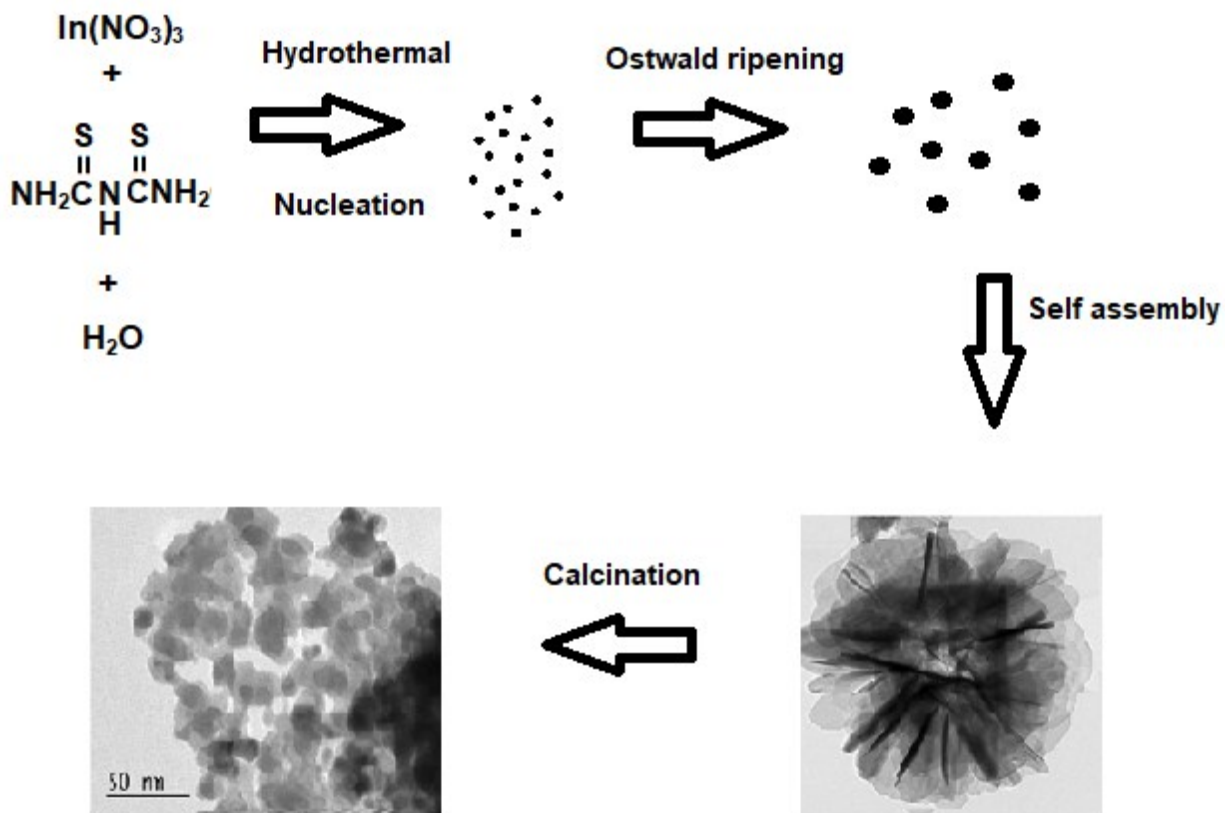

Fig. S5. Schematic formation of  $\text{In}_2\text{O}_3$  microflowers.
